# Supplementary material
Source: MDPI journal article supplement (https://www.mdpi.com/2073-4441/12/1/163)
Supplement: s1 [file s1]

# Removal of trace thallium from real industrial wastewater by Fe<sup>0</sup>-electrocoagulation: Flocs characterization, processing and mechanism

Xianghui Fu, Li Li, Guochao Yang, Xiangyang Xu, Lihua He and Zhongwei Zhao

**Table S1.** The content of Fe<sup>3+</sup> and TFe (wt.%) in flocculent sludges obtained at vary initial pH.

| pH               | 7     | 8     | 9     | 10    | 11    | 12    |
|------------------|-------|-------|-------|-------|-------|-------|
| Fe <sup>3+</sup> | 56.01 | 55.64 | 54.77 | 52.26 | 51.27 | 50.78 |
| TFe              | 56.03 | 55.69 | 54.90 | 52.44 | 51.54 | 51.12 |

**Table S2.** The specific surface area, average pore size and pore volume of flocculent sludges obtained at vary initial pH.

| pH                                        | 7      | 8      | 9      | 10     | 11     | 12     |
|-------------------------------------------|--------|--------|--------|--------|--------|--------|
| Specific surface area/(m <sup>2</sup> /g) | 156.91 | 182.79 | 189.56 | 220.33 | 208.29 | 191.97 |
| Average pore size/nm                      | -      | -      | -      | -      | 6.32   | 6.79   |
| Pore volume/(cc/g)                        | -      | -      | -      | -      | 0.465  | 0.383  |

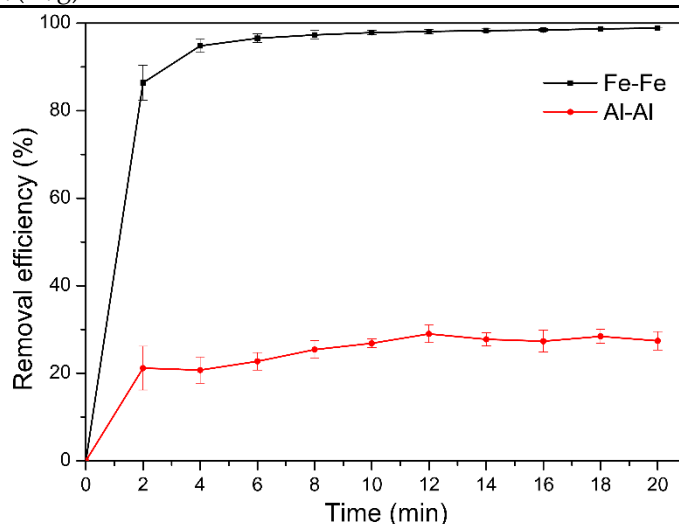

**Figure S1.** Effect of electrode material on Tl(I) removal efficiency within 20 min EC treatment under applied current density of 16.7 mA/cm<sup>2</sup> with initial pH of 11±0.1, electrodes distance of 2 cm. C<sub>0</sub> = 109 µg/L.

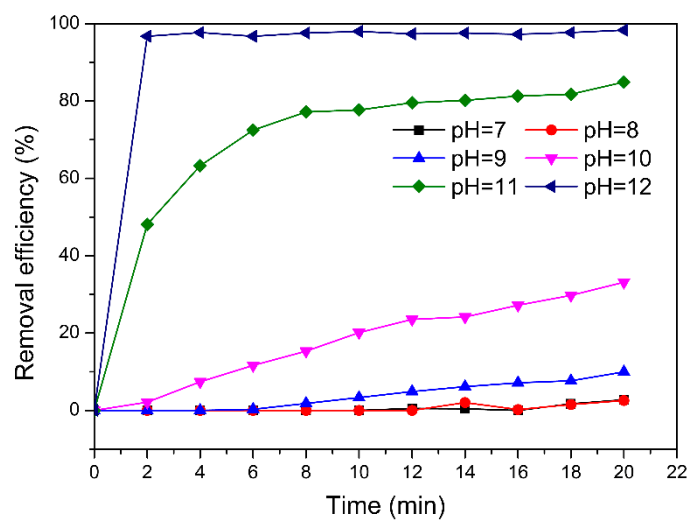

**Figure S2.** Effect of pH on Mg removal efficiency within 20 min EC treatment under applied current density of 16.7 mA/cm<sup>2</sup>, using Fe-Fe electrodes at distance of 2 cm.  $C_0 = 41.5$  mg/L.

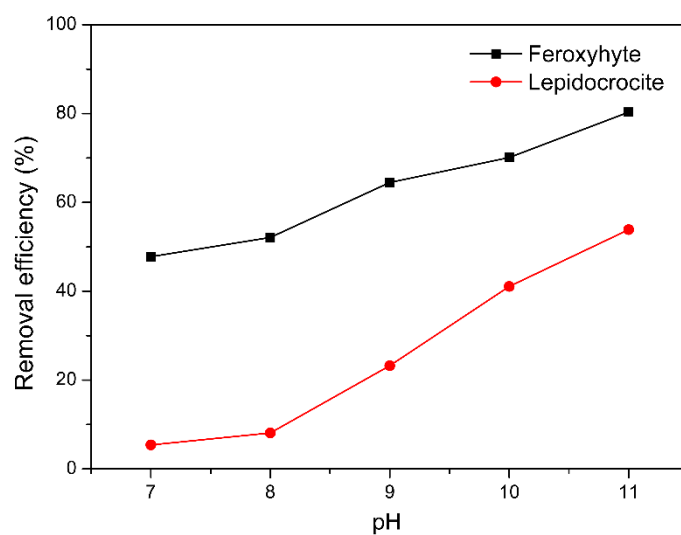

**Figure S3.** Effect of pH on Tl(I) removal efficiency of the as-prepared FeOOH. Adsorbent dose 0.44 g/L, agitation speed at 100 rpm for 4 hours at room temperature (25 °C).  $C_0 = 141$  µg/L.

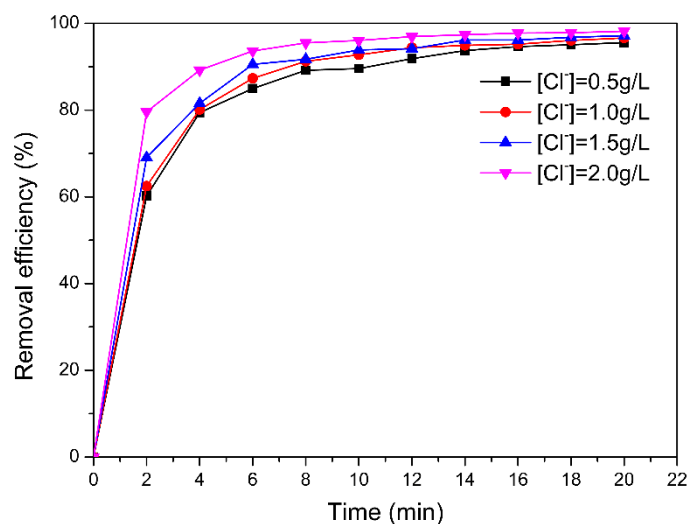

**Figure S4.** Effect of Cl<sup>-</sup> concentration on Tl(I) removal efficiency within 20 min EC treatment under applied current density of 16.7 mA/cm<sup>2</sup>, initial pH of 11 ± 0.1, using Fe-Fe electrodes at distance of 2 cm. C<sub>0</sub> = 95 µg/L.

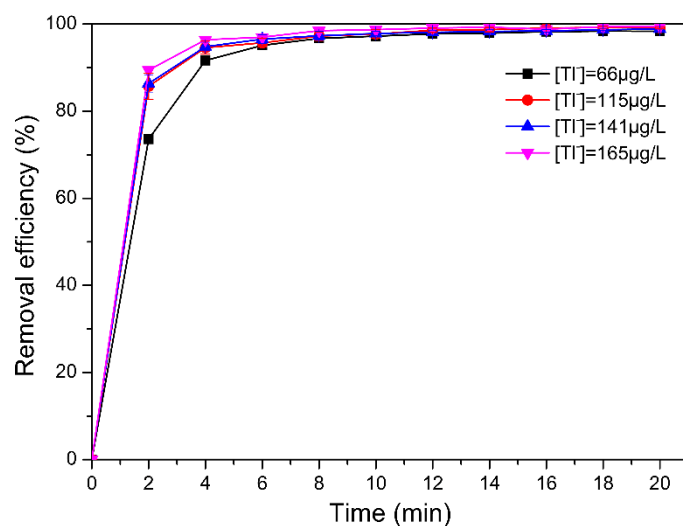

**Figure S5.** Effect of initial Tl(I) concentration on Tl(I) removal efficiency within 20 min EC treatment under initial pH of 11 ± 0.1 with aeration of 0.2 L/min, using Fe-Fe electrodes at distance of 2 cm. C<sub>0</sub> = 66, 115, 141, 165 µg/L, respectively.

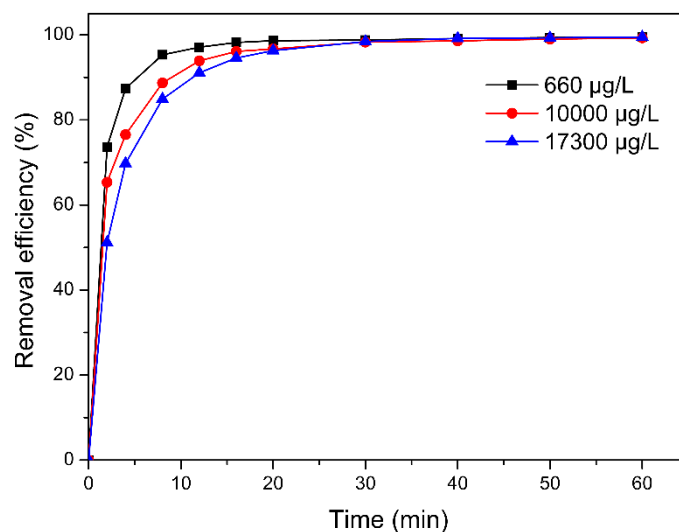

**Figure S6.** Removal efficiency of high Tl(I) concentration within 60 min EC treatment under initial pH of  $11 \pm 0.1$  with aeration of 0.2 L/min, using Fe-Fe electrodes at distance of 2 cm.  $C_0 = 660, 10000$  and  $17,300 \mu\text{g/L}$ , respectively.

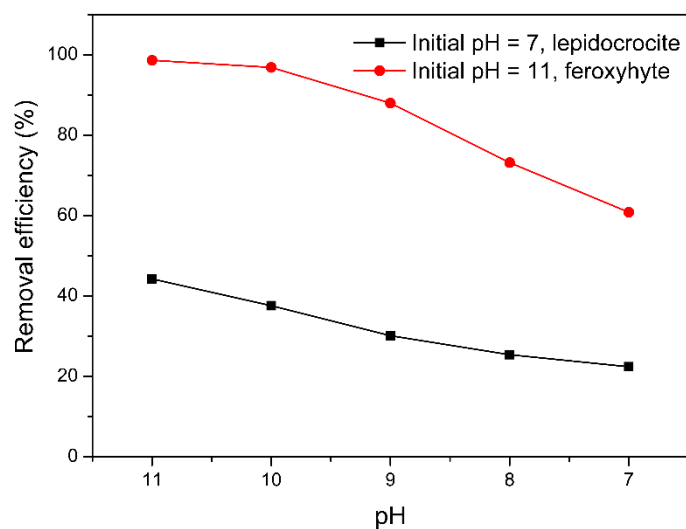

**Figure S7.** Effect of pH on Tl(I) removal efficiency of effluent after 20 min EC treatment under applied current density of  $16.7 \text{ mA/cm}^2$  with aeration of 0.2 L/min, using Fe-Fe electrodes at distance of 2 cm. Initial pH of 7 and 11, respectively.
